# Supplementary material for: Lifestyle counseling in overweight truck and bus drivers - Effects on dietary patterns and physical activity
Source: PubMed Central journal article supplement — Prev Med Rep. 2016 Aug 15;4:435–40. doi: 10.1016/j.pmedr.2016.08.012 (PMC4995529; doi:10.1016/j.pmedr.2016.08.012), 2016-08-15
Supplement: mmc1.pdf [file mmc1.pdf]

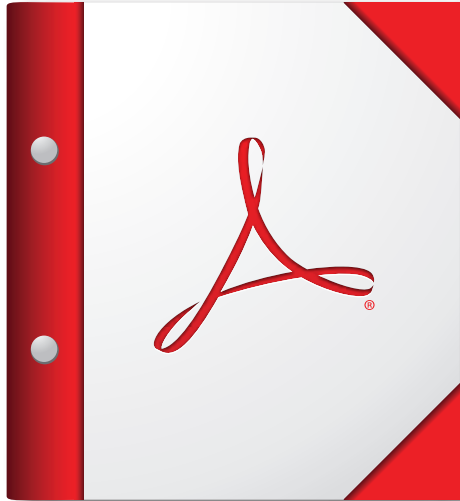

**For the best experience, open this PDF portfolio in  
Acrobat 9 or Adobe Reader 9, or later.**

[Get Adobe Reader Now!](#)
